# Supplementary material
Source: publisher site journal article supplement (https://www.spandidos-publications.com/1490/downloadSupplementary)
Supplement: Supplementary file 1 [file downloadSupplementary]

Table SI. Primers for qRT-PCR validation of the candidate circRNAs.

| circRNA                     | Sense primer            | Antisense primer         |
|-----------------------------|-------------------------|--------------------------|
| chr5: 161330882-161336769-  | CACAATCAACACCCACCTCC    | TATCATCGCCACGCCAGTA      |
| chr12: 129699809-129700698- | CCAAAGACCGTGAGGAAAG     | GAGGTAGGTGGGCAGCAAG      |
| chr9: 22046750-22097364+    | TCAGTAGAGGAAGTGGCAGGA   | GCTGTTGAATCAGAATGAGGCTTA |
| chr20: 17456347-17465553+   | TCACGACGAGGTCCATCAG     | TCCAGAGCCAGTGCAAACA      |
| chr7: 116699070-116700284+  | CGATCTGCCATGTGTGCATT    | CTCGGACTTTGCTAGTGCCT     |
| chr8: 18765448-18804898-    | CTGTCAGGAGTTCATTGCAAATC | TGCTGCTGGTACCATTACTGAG   |
| chr7: 22308338-22318037-    | TCAAACAGTGGACCAGCATC    | CTGGGAAGGCGTATGTTCAAG    |
| chr5: 38523418-38530666-    | CTGCTGATTTCTCAACCTC     | CTTTTATTGTCCACCATCC      |

Table SII. Characteristics of the 53 differentially expressed circRNAs of papillary thyroid carcinoma (PTC) with RNA sequencing.

| ID | circRNA                    | log <sub>2</sub> FC | padj       | Regulation | circBase ID      | Gene name    | Catalogue    | Feature                                                                                                                                                                                                                        | Length |
|----|----------------------------|---------------------|------------|------------|------------------|--------------|--------------|--------------------------------------------------------------------------------------------------------------------------------------------------------------------------------------------------------------------------------|--------|
| 1  | chr5:161330882-161336769-  | 7.3422              | 4.08E-08   | Up         |                  | GABRB2       | Antisense    | exon:161329433-161331127,<br>intron:161334904-161336631,<br>exon:161334751-161334904,<br>intron:161331127-161334751;                                                                                                           | 5,887  |
| 2  | chr5:122692596-122693767+  | 6.2613              | 1.32E-03   | Up         |                  | FRMD3        | Intergenic   | intron:83311975-83313659,                                                                                                                                                                                                      | 1,171  |
| 3  | chr9:83290602-83335639-    | 6.0441              | 0.002365   | Up         |                  |              | Antisense    | intron:83298816-83299111,<br>intron:83299186-83309535,<br>intron:83310548-83311886,<br>intron:83313747-83335515,<br>intron:83290727-83298747,<br>intron:83309624-83310484                                                      | 4,4314 |
| 4  | chr12:94169152-94209704+   | 6.0396              | 0.0027538  | Up         |                  | PLXNC1       | Annot intron | intron:94181580-94186372,<br>intron:94169293-94181445,<br>intron:94186473-94209589                                                                                                                                             | 40,060 |
| 5  | chr12:129699809-129700698- | 5.9252              | 0.015753   | Up         |                  | TMEM132D     | Antisense    | exon:129699809-129700698;                                                                                                                                                                                                      | 889    |
| 6  | chrX:38072046-38110482+    | 5.7452              | 0.0084421  | Up         |                  | RP5-972B16.2 | One intron   | intron:37426000-38666120;                                                                                                                                                                                                      | 3,8436 |
| 7  | chr21:31245487-31266983-   | 5.7067              | 0.0079758  | Up         |                  | TIAM1        | Antisense    | intron:31245660-31251741,<br>intron:31252189-31339242,<br>exon:31251741-31252189                                                                                                                                               | 21,496 |
| 8  | chr5:161410974-161459844-  | 5.6354              | 0.012143   | Up         |                  | GABRB2       | One intron   | intron:161411057-161545226                                                                                                                                                                                                     | 48,870 |
| 9  | chr7:3606251-3642105+      | 5.5858              | 0.012143   | Up         |                  | SDK1         | Exon intron  | intron:3619239-3639003,<br>exon:3619079-3619239,                                                                                                                                                                               | 22,771 |
| 10 | chr9:22046750-22097364+    | 5.509               | 0.018117   | Up         | hsa_circ_0008796 | CDKN2B-AS1   | One intron   | intron:3639110-3641957                                                                                                                                                                                                         | 1,719  |
| 11 | chr8:140864311-140925749-  | 5.4249              | 0.021704   | Up         | hsa_circ_0008778 | PTK2         | Antisense    | intron:22049228-22120503;<br>intron:140846678-140890542,<br>intron:140890603-140925561,<br>exon:140890315-140890769,<br>intron:140890769-141001124;                                                                            | 571    |
| 12 | chr11:46894588-46895291-   | 5.4161              | 0.02071    | Up         |                  | LRP4         | Antisense    | intron:46894819-46895165,<br>exon:46894588-46894819                                                                                                                                                                            | 577    |
| 13 | chr15:27326808-27328888+   | 5.405               | 0.00012486 | Up         | hsa_circ_0034186 | GABRG3       | One exonic   | exon:27326807-27327029;                                                                                                                                                                                                        | 304    |
| 14 | chr1:45700069-45729769-    | 5.4019              | 0.023363   | Up         |                  | IPP          | Antisense    | exon:45714245-45714466,<br>intron:45717017-45719202,<br>exon:45727630-45727798,<br>intron:45700190-45714245,<br>intron:45714466-45716894,<br>intron:45719340-45727630,<br>intron:45727798-45729613,<br>exon:45729613-45729769; | 2,9318 |

Table SII. Continued.

| ID | circRNA                   | log <sub>2</sub> FC | padj       | Regulation | circBase ID      | Gene name    | Catalogue    | Feature                                                                                                                                                                    | Length |
|----|---------------------------|---------------------|------------|------------|------------------|--------------|--------------|----------------------------------------------------------------------------------------------------------------------------------------------------------------------------|--------|
| 15 | chr21:31245487-31252189-  | 5.3133              | 0.028921   | Up         |                  | TIAM1        | Antisense    | exon:31245487-31245660,<br>exon:31251741-31252189,<br>intron:31245660-31251741;                                                                                            | 6,702  |
| 16 | chr2:151841902-151860820- | 5.3018              | 0.028921   | Up         | hsa_circ_0056731 | CTD-2021K4.1 | Antisense    | intron:151815199-151853447;                                                                                                                                                | 544    |
| 17 | chr21:31164961-31203012-  | 5.2706              | 0.033947   | Up         | hsa_circ_0061405 | TIAM1        | Antisense    | intron:31195305-31210044,<br>exon:31182420-31182645,<br>intron:31182645-31187000,<br>intron:31187087-31195223,<br>intron:31165065-31182420;                                | 603    |
| 18 | chrX:22090428-22133624+   | 5.1516              | 0.049577   | Up         | hsa_circ_0090071 | PHEX         | Annot intron | intron:22111560-22114457,<br>intron:22099151-22111466,<br>intron:22094099-22096954,<br>intron:22090497-22093982,<br>intron:22097038-22099005,<br>intron:22114586-22133522; | 741    |
| 19 | chr3:185533570-185535132- | 4.6995              | 0.0027538  | Up         |                  | LIPH         | Antisense    | exon:185534764-185535132,<br>intron:185533679-185534764;                                                                                                                   | 1,453  |
| 20 | chr21:31182420-31203012-  | 4.3229              | 4.87E-06   | Up         | hsa_circ_0061407 | TIAM1        | Antisense    | exon:31182420-31182645,<br>intron:31182645-31187000,<br>intron:31187087-31195223,<br>intron:31195305-31210044;                                                             | 499    |
| 21 | chr8:15650696-15673836+   | 4.1088              | 0.016397   | Up         | hsa_circ_0006410 | TUSC3        | One intron   | intron:15659647-15662155;                                                                                                                                                  | 490    |
| 22 | chr1:45716894-45729769-   | 3.8623              | 0.0027538  | Up         |                  | IPP          | Antisense    | exon:45727630-45727798,<br>exon:45729613-45729769,<br>intron:45719340-45727630,<br>intron:45727798-45729613,<br>intron:45717017-45719202;                                  | 12,614 |
| 23 | chr12:40257247-40274993+  | 3.7022              | 0.00020619 | Up         |                  | LRRK2        | Annot intron | intron:40259604-40263788,<br>intron:40253016-40259479,<br>intron:40263901-40274582;                                                                                        | 17,746 |
| 24 | chr20:17456347-17465553+  | 3.4493              | 0.0076649  | Up         |                  | PCSK2        | Exon intron  | intron:17456448-17465325,<br>exon:17463432-17465553;                                                                                                                       | 9,206  |
| 25 | chr3:64594257-64596991-   | 3.4414              | 3.64E-06   | Up         | hsa_circ_0066444 | ADAMTS9      | Antisense    | exon:64594257-64594434,<br>intron:64594434-64596829;                                                                                                                       | 339    |

Table SII. Continued.

| ID | circRNA                   | log <sub>2</sub> FC | padj       | Regulation | circBase ID      | Gene name | Catalogue    | Feature                                                                                                                                                                                                                                                                                                                                                                                                                                                                                                                                                                                                                                                                                                                                                                                                                                                                                                                                                                                                                                                                 | Length |
|----|---------------------------|---------------------|------------|------------|------------------|-----------|--------------|-------------------------------------------------------------------------------------------------------------------------------------------------------------------------------------------------------------------------------------------------------------------------------------------------------------------------------------------------------------------------------------------------------------------------------------------------------------------------------------------------------------------------------------------------------------------------------------------------------------------------------------------------------------------------------------------------------------------------------------------------------------------------------------------------------------------------------------------------------------------------------------------------------------------------------------------------------------------------------------------------------------------------------------------------------------------------|--------|
| 26 | chr12:40310430-40323306+  | 3.3979              | 0.0011336  | Up         | LRRK2            | LRRK2     | Exon intron  | intron:40315300-40319987,<br>intron:40320175-40321033,<br>intron:40314173-40315211,<br>exon:40310430-40310649,<br>intron:40310649-40313971,<br>intron:40322510-40323159,<br>intron:40321188-40322034,<br>exon:40313971-40314173,<br>exon:40322318-40322510,<br>exon:40319987-40320175;<br>exon:50602632-50602813,<br>intron:50596964-50598265,<br>intron:50598535-50602632,<br>intron:50602813-50607380,<br>exon:50607380-50608184,<br>exon:50598265-50598535,<br>exon:50591646-50596964;<br>exon:116699070-116700284;<br>intron:18765538-18799294,<br>exon:18804703-18804898,<br>intron:18801382-18804521;<br>exon:48008633-48009114;<br>intron:31187087-31195223,<br>intron:31182645-31187000,<br>exon:31182420-31182645;<br>exon:3619079-3619239,<br>intron:3639110-3641957,<br>intron:3619239-3639003;<br>intron:40302882-40303947,<br>exon:40303947-40304976;<br>intron:50598535-50602632,<br>exon:50602632-50602813,<br>exon:50607380-50608184,<br>intron:50602813-50607380,<br>exon:50598265-50598535;<br>intron:94181580-94186372,<br>intron:94169293-94181445; | 12,201 |
| 27 | chrX:50595697-50608184-   | 3.2019              | 0.0027538  | Up         | SHROOM4          | SHROOM4   | Antisense    |                                                                                                                                                                                                                                                                                                                                                                                                                                                                                                                                                                                                                                                                                                                                                                                                                                                                                                                                                                                                                                                                         | 12,487 |
| 28 | chr7:116699070-116700284+ | 3.1895              | 7.90E-06   | Up         | hsa_circ_0082002 | MET       | One exonic   |                                                                                                                                                                                                                                                                                                                                                                                                                                                                                                                                                                                                                                                                                                                                                                                                                                                                                                                                                                                                                                                                         | 1,214  |
| 29 | chr8:18765448-18804898-   | 3.1644              | 2.06E-10   | Up         | hsa_circ_0002111 | PSD3      | Antisense    |                                                                                                                                                                                                                                                                                                                                                                                                                                                                                                                                                                                                                                                                                                                                                                                                                                                                                                                                                                                                                                                                         | 538    |
| 30 | chr6:48008633-48009114-   | 3.1172              | 0.020919   | Up         | hsa_circ_0076710 | PTCHD4    | One exonic   |                                                                                                                                                                                                                                                                                                                                                                                                                                                                                                                                                                                                                                                                                                                                                                                                                                                                                                                                                                                                                                                                         | 481    |
| 31 | chr9:21476898-21477292-   | 3.0822              | 0.038702   | Up         | hsa_circ_0008599 |           | Antisense    |                                                                                                                                                                                                                                                                                                                                                                                                                                                                                                                                                                                                                                                                                                                                                                                                                                                                                                                                                                                                                                                                         | 261    |
| 32 | chr21:31182420-31195305-  | 3.0463              | 0.00020619 | Up         | hsa_circ_0061406 | TIAM1     | Antisense    |                                                                                                                                                                                                                                                                                                                                                                                                                                                                                                                                                                                                                                                                                                                                                                                                                                                                                                                                                                                                                                                                         | 394    |
| 33 | chr7:3619079-3642105+     | 2.9826              | 5.20E-07   | Up         | SDK1             | SDK1      | Exon intron  |                                                                                                                                                                                                                                                                                                                                                                                                                                                                                                                                                                                                                                                                                                                                                                                                                                                                                                                                                                                                                                                                         | 22,771 |
| 34 | chr12:40302788-40304134+  | 2.8124              | 0.00020619 | Up         | hsa_circ_0025887 | LRRK2     | Exon intron  |                                                                                                                                                                                                                                                                                                                                                                                                                                                                                                                                                                                                                                                                                                                                                                                                                                                                                                                                                                                                                                                                         | 281    |
| 35 | chrX:50598265-50608184-   | 2.567               | 0.012143   | Up         | hsa_circ_0090585 | SHROOM4   | Antisense    |                                                                                                                                                                                                                                                                                                                                                                                                                                                                                                                                                                                                                                                                                                                                                                                                                                                                                                                                                                                                                                                                         | 1,255  |
| 36 | chr12:94169152-94186473+  | 2.5662              | 3.64E-06   | Up         | PLXNC1           | PLXNC1    | Annot intron |                                                                                                                                                                                                                                                                                                                                                                                                                                                                                                                                                                                                                                                                                                                                                                                                                                                                                                                                                                                                                                                                         | 16,944 |

Table SII. Continued.

| ID | circRNA                   | log <sub>2</sub> FC | padj       | Regulation | circBase ID      | Gene name | Catalogue   | Feature                                                                                                                                                                                             | Length |
|----|---------------------------|---------------------|------------|------------|------------------|-----------|-------------|-----------------------------------------------------------------------------------------------------------------------------------------------------------------------------------------------------|--------|
| 37 | chr5:93553760-93563463-   | 2.5079              | 0.0080171  | Up         | hsa_circ_0007747 | NR2F1-AS1 | Antisense   | intron:93411509-93563363;                                                                                                                                                                           | 325    |
| 38 | chr12:32327460-32328555+  | 2.4464              | 0.0065615  | Up         | hsa_circ_0025841 | BICD1     | One exonic  | exon:32327460-32328555;                                                                                                                                                                             | 1,095  |
| 39 | chr7:22308338-22318037-   | 2.3679              | 0.0028451  | Up         |                  | RAPGEF5   | Antisense   | intron:22308507-22309968,<br>exon:22308338-22308507,<br>intron:22310090-22315369,<br>intron:22315476-22317986;                                                                                      | 9,419  |
| 40 | chr8:18799294-18804898-   | 2.2327              | 5.35E-07   | Up         | hsa_circ_0004458 | PSD3      | Antisense   | intron:18801382-18804521,<br>exon:18804703-18804898;                                                                                                                                                | 448    |
| 41 | chr4:185247293-185267155+ | 2.0931              | 0.023363   | Up         | hsa_circ_0004874 | SNX25     | Exon intron | intron:185264498-185266968,<br>intron:185247378-185258847,<br>exon:185266968-185267155,<br>intron:185259064-185264437,<br>exon:185264437-185264610,<br>exon:185258847-185259064;                    | 662    |
| 42 | chr1:232460886-232471528- | 1.961               | 0.00025433 | Up         |                  | SIPA1L2   | Antisense   | exon:232460886-232461161,<br>intron:232461161-232464839,<br>exon:232464839-232465416,<br>exon:232471370-232471528,<br>intron:232465416-232471370;                                                   | 10,642 |
| 43 | chr15:94356136-94385525+  | 1.8906              | 0.035786   | Up         |                  | MCTP2     | Exon intron | intron:94367791-94370086,<br>exon:94367604-94367791,<br>intron:94358612-94367604,<br>intron:94356301-94358546,<br>exon:94355973-94356301,<br>intron:94370180-94384021,<br>intron:94384124-94385422; | 29,186 |
| 44 | chr8:18867673-18872733-   | 1.8167              | 0.0028274  | Up         |                  | PSD3      | Antisense   | intron:18868069-18871625,<br>exon:18867673-18868069,<br>exon:18871625-18872733;                                                                                                                     | 5,060  |
| 45 | chr5:124701013-124701269- | 1.4807              | 0.0014106  | Up         | hsa_circ_0001523 | ZNF608    | Antisense   | exon:124701013-124701269;                                                                                                                                                                           | 256    |
| 46 | chr5:38523418-38530666-   | -1.3171             | 0.0006677  | Down       | hsa_circ_0072309 | LIFR      | Antisense   | intron:38527294-38528725,<br>exon:38530505-38530917,<br>intron:38528840-38530505,<br>exon:38523418-38523582,<br>intron:38523582-38527154;                                                           | 580    |

Table SII. Continued.

| ID | circRNA                   | log <sub>2</sub> FC | padj     | Regulation | circBase ID      | Gene name | Catalogue   | Feature                                                                                                                                                                                                                                                                                                                                                                                                                                                                                                                                                                                      | Length |
|----|---------------------------|---------------------|----------|------------|------------------|-----------|-------------|----------------------------------------------------------------------------------------------------------------------------------------------------------------------------------------------------------------------------------------------------------------------------------------------------------------------------------------------------------------------------------------------------------------------------------------------------------------------------------------------------------------------------------------------------------------------------------------------|--------|
| 47 | chr8:109412264-109427156+ | -2.0603             | 0.039207 | Down       |                  | PKHD1L1   | Exon intron | intron:109419260-109420517,<br>intron:109412414-109413420,<br>intron:109425232-109427001,<br>exon:109420517-109420690,<br>exon:109419096-109419260,<br>exon:109427001-109427156,<br>intron:109413545-109419096;<br>intron:14079354-14140543,<br>exon:14140543-14144785;<br>intron:110144569-110146752,<br>intron:110146835-110147915,<br>exon:110143541-110144569,<br>intron:110148026-110150181;<br>intron:39190502-39204526,<br>intron:39204617-39213399,<br>exon:39229364-39229588,<br>intron:39187709-39190304,<br>intron:39184647-39187626;                                             | 10,075 |
| 48 | chr16:14079289-14140760+  | -5.1466             | 0.049682 | Down       | hsa_circ_0037936 | MKL2      | Exon intron |                                                                                                                                                                                                                                                                                                                                                                                                                                                                                                                                                                                              | 282    |
| 49 | chr2:110143541-110150256- | -5.3255             | 0.033947 | Down       |                  | NPHP1     | Antisense   |                                                                                                                                                                                                                                                                                                                                                                                                                                                                                                                                                                                              | 6,446  |
| 50 | chr2:39179186-39229588-   | -5.3702             | 0.026155 | Down       |                  | CDKL4     | Antisense   |                                                                                                                                                                                                                                                                                                                                                                                                                                                                                                                                                                                              | 28,604 |
| 51 | chr6:49709144-49714438+   | -5.4001             | 0.023363 | Down       |                  | VPS50     | Intergenic  |                                                                                                                                                                                                                                                                                                                                                                                                                                                                                                                                                                                              | 5,294  |
| 52 | chr7:93252652-93323732+   | -5.4921             | 0.01831  | Down       |                  |           | Exon intron | intron:93257464-93258158,<br>intron:93294636-93296741,<br>intron:93291835-93294544,<br>intron:93253931-93256508,<br>intron:93308942-93311165,<br>intron:93271262-93272634,<br>intron:93259632-93271219,<br>intron:93303550-93305827,<br>intron:93258392-93259549,<br>intron:93239950-93253859,<br>intron:93311272-93340597,<br>intron:93276305-93291702,<br>intron:93306004-93308823,<br>exon:93305827-93306004,<br>intron:93296836-93297144,<br>intron:93272733-93276164,<br>intron:93297243-93303459,<br>intron:93256562-93257393;<br>intron:20412148-20472828,<br>exon:20470932-20472956; | 71,080 |
| 53 | chr20:20425608-20472956-  | -5.593              | 0.012384 | Down       |                  | RALGAPA2  | Antisense   |                                                                                                                                                                                                                                                                                                                                                                                                                                                                                                                                                                                              | 47,348 |
